# Supplementary material
Source: HighWire-hosted journal article supplement (https://bmjopen.bmj.com/content/11/11/e051430)
Supplement: inline-supplementary-material-2 [file inline-supplementary-material-2.pdf]

TYPE 1 DIABETES CAN AFFECT MANY PARTS OF YOUR LIFE.  
THIS MIGHT INCLUDE YOUR:

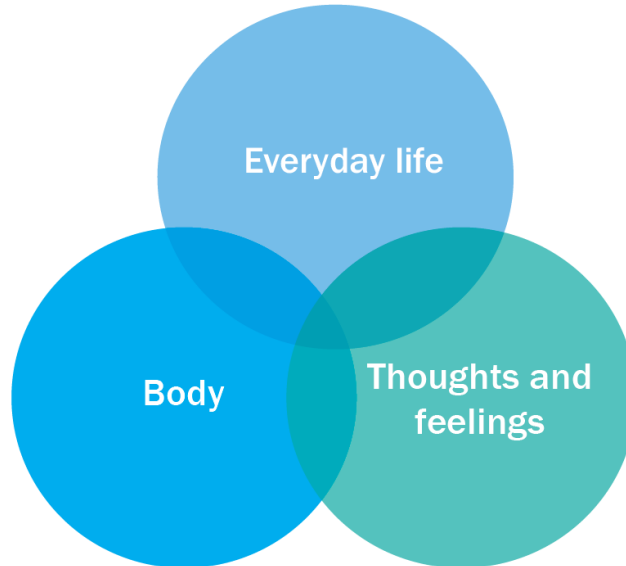

TYPE 1 DIABETES CAN AFFECT MANY PARTS OF YOUR LIFE.  
THIS MIGHT INCLUDE YOUR:

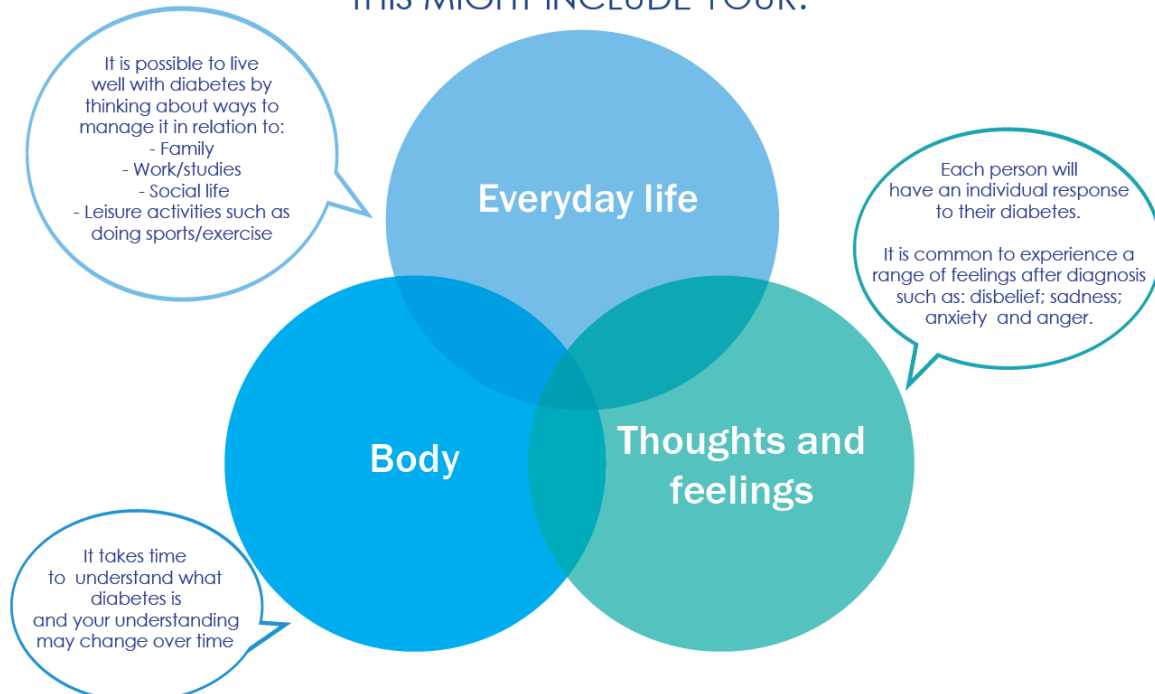

Please reference this paper
